# Supplementary material for: A microfluidic platform reveals differential response of regulatory T cells to micropatterned costimulation arrays
Source: Royal Society of Chemistry journal article supplement (doi:10.1039/c5ib00215j), 2015-09-16
Supplement: c5ib00215j1.pdf [file c5ib00215j1.pdf]

Supplemental Movie 1. Real-time responses of  $T_{conv}$ s to COL patterns. Fluorescent images of COL patterns (blue) and IRM images (green) of  $T_{conv}$ s were obtained for 30 min with 20 s intervals using a 60X objective. The movie shows the period 15 min to 30 min after cell seeding.

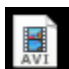

Movie -Tconv-COL 15-30 min .avi
